# Supplementary material for: Clinical value of next generation sequencing of plasma cell-free DNA in gastrointestinal stromal tumors
Source: Springer Nature journal article supplement (doi:10.1186/s12885-020-6597-x), 2020-02-05

## Supplementary material

Supplementary Figure 1

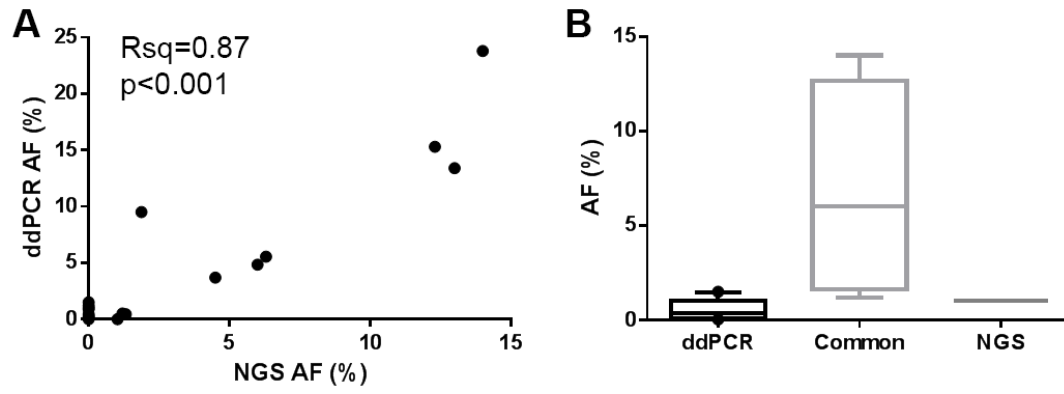

Supplement: MOESM1 [file 17641418]
